# Supplementary material for: The Association of Context with Reported Self-Efficacy for Cancer-Preventive Behaviors and Perceived Cancer Risk in U.S. Adults from the Midlife in the United States (MIDUS) Study
Source: MDPI journal article supplement (doi:10.3390/ijerph21010062), 2024-01-03
Supplement: s1 [file s1]

**Table S1.** Correlations between participant characteristics and perceived cancer risk and prevention efficacy (N = 2450).

|                                     | Age             | Sex            | Education      | Income | Marital Status | Race and ethnicity | Positive relations | Family history of cancer | Residential tenure |
|-------------------------------------|-----------------|----------------|----------------|--------|----------------|--------------------|--------------------|--------------------------|--------------------|
| Self-efficacy for cancer prevention | <b>-0.06**</b>  | <b>0.06**</b>  | <b>0.06***</b> | 0.03   | -0.01          | -0.00              | <b>0.07***</b>     | -0.02                    | -0.02              |
| Perceived cancer risk               | <b>-0.16***</b> | <b>0.09***</b> | <b>-0.06**</b> | -0.02  | -0.04          | 0.02               | <b>-0.06***</b>    | <b>-0.23***</b>          | <b>-0.07***</b>    |

**Notes.** Pearson's correlations were conducted for continuous by continuous, point biserial correlations for binary by continuous variables, Kendall's coefficient of rank correlations for continuous by ordinal, and regression test for nominal by continuous variables. Boldface indicates statistical significance. \* p < 0.05, \*\* p < 0.01, \*\*\* p < 0.001.

**Table S2.** Standardized beta weights and 95% CI for regression analyses of perceived neighborhood conditions predicting perceived cancer risk and prevention efficacy (N = 2450).

|                           | Perceived Cancer Risk        |               |                       | Perceived Cancer Prevention Efficacy |             |                       |
|---------------------------|------------------------------|---------------|-----------------------|--------------------------------------|-------------|-----------------------|
|                           | Unstandardized Estimate (SE) | 95% CI        | Standardized Estimate | Unstandardized Estimate (SE)         | 95% CI      | Standardized Estimate |
| <b>Trust and safety</b>   |                              |               |                       |                                      |             |                       |
| Tertile 1 (low)           |                              |               |                       |                                      |             |                       |
| Tertile 2                 | <b>-0.12* (0.06)</b>         | -0.24, -0.002 | <b>-0.04*</b>         | <b>0.18** (0.06)</b>                 | 0.06, 0.30  | <b>0.07**</b>         |
| Tertile 3 (high)          | <b>-0.17* (0.07)</b>         | -0.31, -0.03  | <b>-0.05*</b>         | <b>0.36*** (0.07)</b>                | 0.21, 0.50  | <b>0.12***</b>        |
| <b>Social integration</b> |                              |               |                       |                                      |             |                       |
| Tertile 1 (low)           |                              |               |                       |                                      |             |                       |
| Tertile 2                 | -0.09 (0.06)                 | -0.21, 0.03   | -0.03                 | <b>0.23*** (0.06)</b>                | 0.11, 0.36  | <b>0.08***</b>        |
| Tertile 3 (high)          | <b>-0.20** (0.07)</b>        | -0.34, -0.06  | <b>-0.07**</b>        | <b>0.36*** (0.07)</b>                | 0.21, 0.50  | <b>0.12***</b>        |
| <b>Built conditions</b>   |                              |               |                       |                                      |             |                       |
| Tertile 1 (worse)         |                              |               |                       |                                      |             |                       |
| Tertile 2                 | -0.04 (0.08)                 | -0.20, 0.12   | -0.01                 | -0.05 (0.08)                         | -0.22, 0.11 | -0.01                 |
| Tertile 3 (better)        | <b>-0.19** (0.06)</b>        | -0.31, -0.08  | <b>-0.07**</b>        | <b>0.24*** (0.06)</b>                | 0.12, 0.36  | <b>0.09***</b>        |

**Notes.** 95% confidence intervals in brackets. Multivariate regression analysis adjusted for age (continuous), sex, marital status (married, other [separated, divorced, widowed, never married]), education (high school degree or less, some college, college degree, graduate degree), income (<\$60,000; \$60,000 to \$99,999; 100,000+), race and ethnicity (non-Hispanic White, non-Hispanic Black, other), well-being (continuous), family history of cancer, and residential tenure (< 6 years, 6 to 14 years, > 15 years). Models of perceived cancer risk and prevention efficacy tested main perceived neighborhood exposure variables in separate models. Effect modifiers were tested in separate fully adjusted models. Boldface indicates statistical significance. \* p < 0.05, \*\* p < 0.01, \*\*\* p < 0.001.
